# Supplementary material
Source: PubMed Central journal article supplement (PMC6856325)
Supplement: AEM.01530-19-s0001.pdf [file AEM.01530-19-s0001.pdf]

**Table S2** Strains and plasmids used in this study.

| <i>E. Coli</i> strain or plasmid | Characteristic (s)                                                       | Source or reference |
|----------------------------------|--------------------------------------------------------------------------|---------------------|
| Strains                          |                                                                          |                     |
| DH5 $\alpha$                     | Cloning host                                                             | Novagen             |
| BL21(DE3)                        | Expression host                                                          | Novagen             |
| BL21(DE3)-condon plus RIL        | Expression host                                                          | Novagen             |
| CYP105D7-FdxH-FprD               | Recombinant <i>E. coli</i> strain co- expression CYP105D7, FdxH and FprD | This work           |
| Plasmids                         |                                                                          |                     |
| pET11- <i>sav7469-pdx-pdr</i>    | Vector for coexpression of CYP105D7, Pdx and Pdr                         | Previous study      |
| pET28b- <i>sav7469</i>           | Vector for heterologous expression of CYP105D7                           | This work           |
| pET28b- <i>sav7469-RhFRED</i>    | Vector for coexpression of CYP105D7 and RhFRED                           | This work           |
| pCDFDuet-1- <i>fdxH-fprD</i>     | Vector for coexpression of FdxH and FprD                                 | This work           |

**Table S3** Primers of mutants used in this study.

| Oligonucleotide | Primer sequence(5'-3')                                                                   |
|-----------------|------------------------------------------------------------------------------------------|
| R70A            | AGCGGCTTTCCTCCGAC <u>CGC</u> GACGCTGCCCAGGTTCCC<br>GGGAACCTGGGCAGCGTCGCGTCGGAGGAAAGCCGCT |
| R81A            | TCCCCGCGACCACCGAGGCGTTCGAGGCCGTACGCAC<br>GTGCGTACGGCCTCGAACGCCTCGGTGGTCGCGGGGA           |
| R86A            | AGCGGTTCGAGGCCGTAGCGACCCGCCGGGTGGCGCT<br>AGCGCCACCCGGCGGGTCGCTACGGCCTCGAACCGCT           |
| R88A            | TCGAGGCCGTACGCACCGCGCGGGTGGCGCTGCTCGG<br>CCGAGCAGCGCCACCCGCGCGGTGCGTACGGCCTCGA           |
| R89A            | AGGCCGTACGCACCCGCGCGGTGGCGCTGCTCGGTGT<br>ACACCGAGCAGCGCCACCGCGCGGGTGCCTACGGCCT           |
| R190A           | CCGAGGTCCAGGACGCCGCGGCCCAACTGGACGACTA<br>TAGTCGTCCAGTTGGGCCGCGGGCGTCCTGGACCTCGG          |

**Fig. S1** Maps for recombinant plasmids. (A) Co-expression system of CYP105D7 and variants with redox proteins, Pdx and Pdr. (B) Self-sufficient system of CYP105D7-RhFRED. (C) Co-expression system of CYP105D7 with its natural redox proteins, FdxH and FprD.

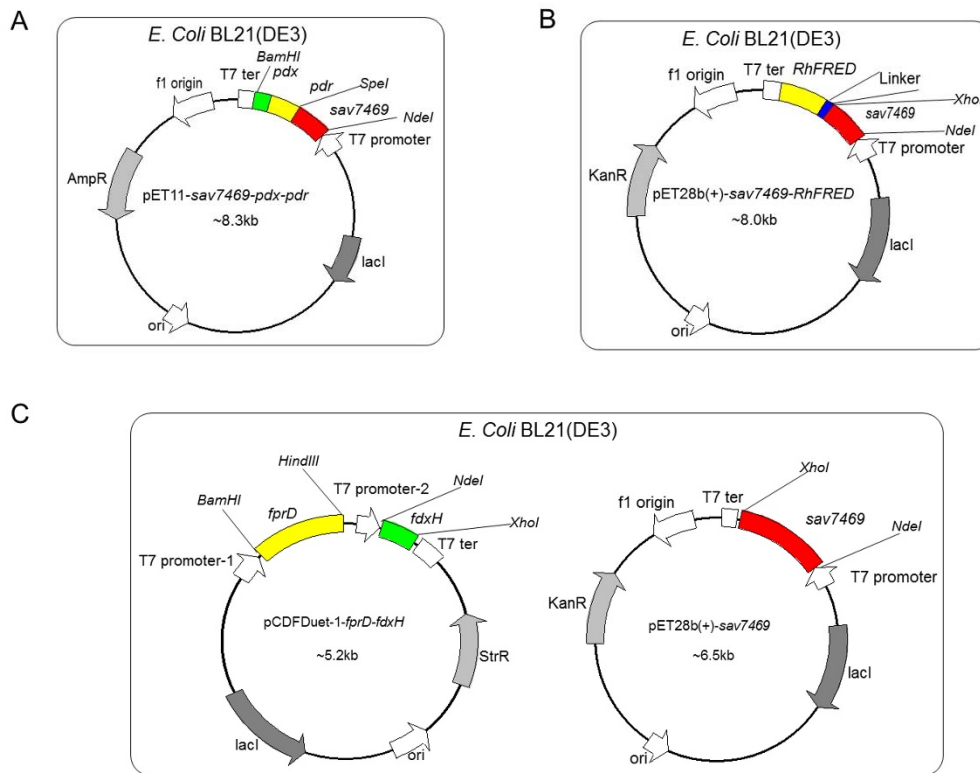

**Fig. S2** Spectral analysis of CYP105D7 wild type and its mutants. Spectra are shown for the oxidized (solid line), dithionite-reduced (dashed line), and CO-bound (chain line) forms of the enzyme. Inset: reduced CO difference spectrum. Spectral features of N-terminal His6-tagged CYP105D7 wild type (A), R70A (B), R81A (C), R86A (D), R88A (E), R89A (F), R190A (G), R70A/R81A (H), R70A/R190A (I) were determined.

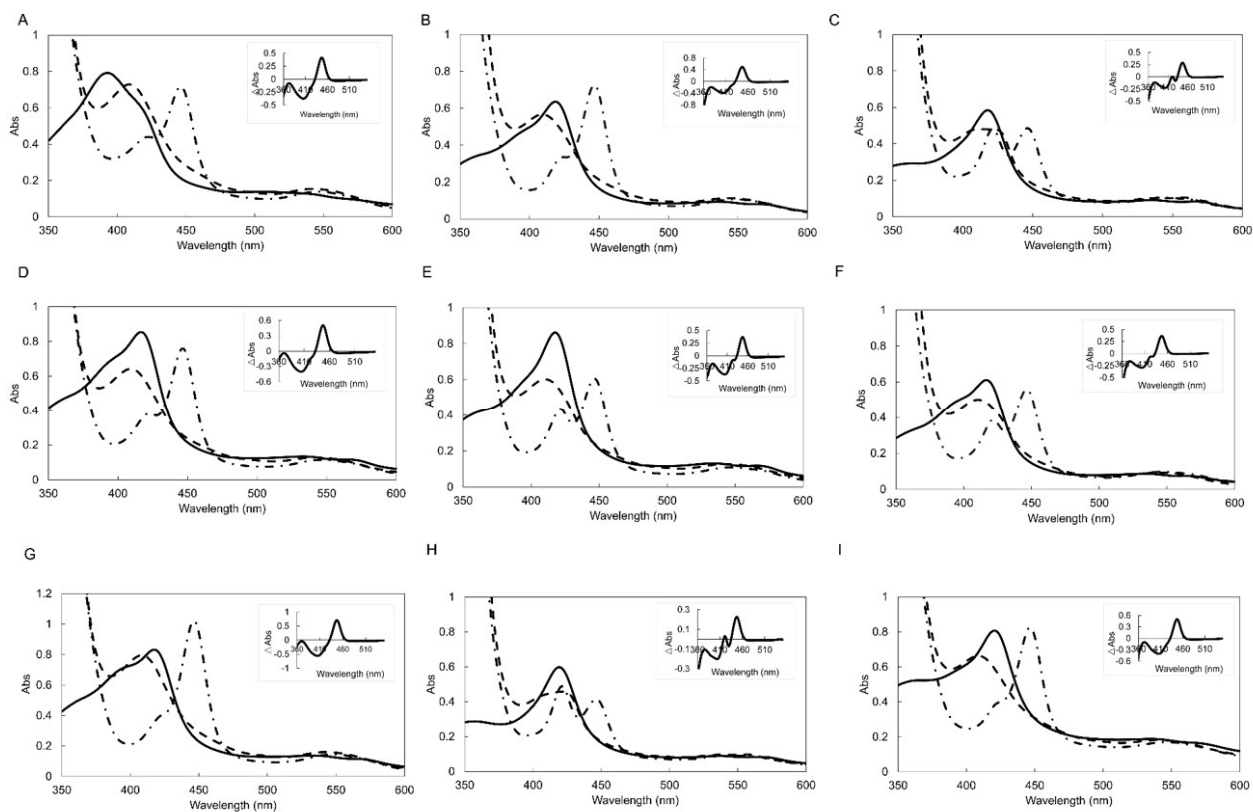

**Fig. S3** Determination of steady-state kinetic parameters of CYP105D7 and its mutants (R70A, R190A and R70A/R190A) hydroxylation of testosterone. The vertical and horizontal axes show the initial velocity of the reaction and concentration of the substrate, respectively. The error bars in this figure represent three independent experiments with standard deviations.

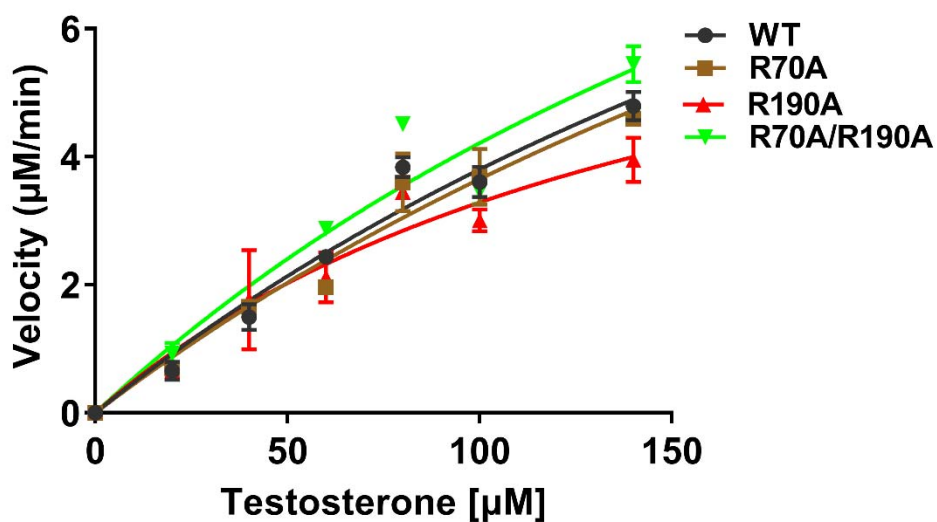

Purification and identification of biotransformation of steroid compounds. The purified hydroxylated products were dissolved in Chloroform-*d* for NMR analysis. Products were identified by <sup>1</sup>H NMR and <sup>13</sup>C NMR spectroscopy on a Bruker 500 spectrometer or a JEOL 600 spectrometer, and HRESIMS data were acquired on an Agilent 6230 TOF LC/MS spectrometer.

### **2β-hydroxytestosterone**

<sup>13</sup>C NMR (125 MHz, Chloroform-*d*) δ 199.9, 175.3, 118.8, 81.7, 68.7, 50.6, 50.4, 43.5, 41.6, 39.6, 36.5, 36.0, 34.7, 33.1, 30.6, 23.5, 23.0, 22.7, 11.4.

<sup>1</sup>H NMR (600 MHz, Chloroform-*d*) δ 5.81 (d, *J* = 1.3 Hz, 1H), 4.18 (dd, *J* = 13.9, 5.6 Hz, 1H), 3.66 (t, *J* = 8.6 Hz, 1H), 2.53 (dddd, *J* = 13.7, 12.3, 5.0, 1.5 Hz, 1H), 2.48 (dd, *J* = 13.7, 5.6 Hz, 1H), 2.25 (ddd, *J* = 12.3, 4.4, 2.6 Hz, 1H), 2.11 – 2.03 (m, 1H), 1.98 (ddq, *J* = 11.8, 4.7, 2.7 Hz, 1H), 1.88 (ddd, *J* = 12.8, 4.0, 2.8 Hz, 1H), 1.79 (dq, *J* = 13.5, 3.8 Hz, 1H), 1.70 (dtd, *J* = 11.9, 10.6, 4.1 Hz, 1H), 1.61 – 1.55 (m, 1H), 1.55 – 1.51 (m, 2H), 1.50 – 1.42 (m, 1H), 1.39 (ddd, *J* = 12.5, 10.3, 3.9 Hz, 1H), 1.32 – 1.29 (m, 1H), 1.19 (s, 3H), 1.13 (td, *J* = 12.9, 4.2 Hz, 1H), 1.05 – 0.95 (m, 2H), 0.79 (s, 3H); HRESIMS [M+Na]<sup>+</sup> calcd for C<sub>19</sub>H<sub>28</sub>O<sub>3</sub>: 327.1936, found: 327.1931.

### **2β-hydroxyprogesterone**

<sup>13</sup>C NMR (125 MHz, Chloroform-*d*) δ 209.2, 199.7, 174.9, 118.8, 68.5, 63.4, 56.0, 49.9, 44.4, 41.4, 39.4, 38.6, 35.8, 34.9, 33.0, 31.5, 24.3, 22.9, 22.9, 22.8, 13.5.

<sup>1</sup>H NMR (600 MHz, Chloroform-*d*) δ 5.82 (s, 1H), 4.19 (dd, *J* = 14.34, 5.38 Hz, 1H), 2.57 – 2.52 (m, 2H), 2.48 (dd, *J* = 13.8, 5.5 Hz, 1H), 2.29 – 2.24 (m, 1H), 2.23 – 2.17 (m, 1H), 2.13 (s, 3H), 2.11 – 2.08 (m, 1H), 2.02 – 1.97 (m, 1H), 1.85 – 1.81 (m, 1H), 1.70 – 1.65 (m, 3H), 1.58 – 1.52 (m, 2H), 1.49 – 1.45 (m, 2H), 1.25 (s, 1H), 1.24 – 1.19 (m, 1H), 1.18 (s, 3H), 1.11 – 1.04 (m, 1H), 0.66 (s, 3H); HRESIMS [M+Na]<sup>+</sup> calcd for C<sub>21</sub>H<sub>30</sub>O<sub>3</sub>: 353.2093, found: 353.2089.

### **16β-hydroxyprogesterone**

<sup>13</sup>C NMR (125 MHz, Chloroform-*d*) δ 213.1, 199.5, 170.7, 124.1, 72.2, 66.0, 55.7, 54.1, 44.0, 39.0, 38.8, 38.7, 36.8, 35.8, 34.5, 33.9, 32.8, 29.8, 20.8, 17.4, 14.8.

<sup>1</sup>H NMR (600 MHz, Chloroform-*d*) δ 5.74 (s, 1H), 4.61 – 4.56 (m, 1H), 2.47 – 2.39 (m, 2H), 2.38-2.35 (m, 1H), 2.35 – 2.33 (m, 1H), 2.32 – 2.29 (m, 1H), 2.29 – 2.26 (m, 1H), 2.22 (s, 3H), 2.09 – 2.00 (m, 2H), 1.87 (d, *J* = 18.2 Hz, 1H), 1.78 – 1.72 (m, 1H), 1.71 – 1.61 (m, 2H), 1.52 (dd, *J* = 13.0, 4.1 Hz, 1H), 1.44 – 1.36 (m, 1H), 1.25 (s, 3H), 1.15 – 1.09 (m, 1H), 1.21(s, 3H),1.12-1.09 (m, 1H), 1.06-0.99 (m, 1H), 0.90-0.85 (m, 1H); HRESIMS [M+Na]<sup>+</sup> calcd for C<sub>21</sub>H<sub>30</sub>O<sub>3</sub>: 353.2093, found: 353.2088.

### **2β-hydroxy-4-Androstene-3,17-dione**

<sup>13</sup>C NMR (125 MHz, Chloroform-*d*) δ 219.9, 199.7, 174.2, 119.1, 68.3, 50.8, 50.0, 48.0, 41.5, 39.4, 35.8, 35.3, 33.8, 32.8, 31.3, 22.9, 22.2, 21.9, 14.0.

<sup>1</sup>H NMR (600 MHz, Chloroform-*d*) δ 5.76 (s, 1H), 4.23 – 4.13 (m, 1H), 2.56 – 2.45 (m, 1H), 2.45 – 2.37 (m, 2H), 2.36 – 2.33 (m, 1H), 2.09 – 2.01 (m, 2H), 2.00 – 1.95 (m, 1H), 1.94 – 1.86 (m, 2H), 1.83 – 1.76 (m, 1H), 1.66 – 1.60 (m, 1H), 1.58 – 1.50 (m, 2H), 1.45 – 1.41 (m, 1H), 1.35 – 1.27 (m, 2H), 1.22 (s, 3H), 1.17 – 1.11 (m, 1H), 1.00 (s, 3H); HRESIMS [M+Na]<sup>+</sup> calcd for C<sub>19</sub>H<sub>26</sub>O<sub>3</sub>: 325.1780, found: 325.1779.

### **16β-hydroxy-4-Androstene-3,17-dione**

$^{13}\text{C}$  NMR (125 MHz, Chloroform- $d$ )  $\delta$  219.7, 199.2, 169.9, 124.1, 74.8, 53.8, 46.5, 45.0, 38.2, 35.4, 33.9, 33.6, 32.3, 31.3, 31.1, 30.7, 19.9, 17.1, 14.6.

$^1\text{H}$  NMR (600 MHz, Chloroform- $d$ )  $\delta$  5.83 (d,  $J$  = 1.2 Hz, 1H), 4.18 (dd,  $J$  = 13.9, 5.6 Hz, 1H), 2.60 – 2.54 (m, 1H), 2.50 – 2.45 (m, 2H), 2.34 – 2.29 (m, 1H), 2.12 (d,  $J$  = 9.1 Hz, 1H), 2.10 – 2.06 (m, 1H), 1.96 – 1.92 (m, 1H), 1.88 (t,  $J$  = 3.0 Hz, 1H), 1.87 – 1.82 (m, 1H), 1.61 – 1.57 (m, 1H), 1.56 (d,  $J$  = 3.6 Hz, 1H), 1.55 – 1.51 (m, 1H), 1.48 – 1.43 (m, 1H), 1.35 – 1.32 (m, 1H), 1.31 – 1.24 (m, 1H), 1.20 (s, 3H), 1.13 (qd,  $J$  = 13.0, 4.3 Hz, 1H), 0.97 – 0.92 (m, 1H), 0.92 (s, 3H); HRESIMS  $[\text{M}+\text{Na}]^+$  calcd for  $\text{C}_{19}\text{H}_{26}\text{O}_3$ : 325.1780, found: 325.1781.
